# Supplementary material for: Improving the Efficiency of Psychotherapy for Depression: Computer-Assisted Versus Standard CBT
Source: Atypon-hosted journal article supplement (doi:10.1176/appi.ajp.2017.17010089), 2017-10-03
Supplement: appi.ajp.2017.17010089.ds001.pdf [file appi.ajp.2017.17010089.ds001.pdf]

Data Supplement for Thase et al., Improving the Efficiency of Psychotherapy for Depression: Computer-Assisted Versus Standard CBT. Am J Psychiatry (doi: 10.1176/appi.ajp.2017.17010089)

## **Contents**

1. CONSORT Flow Diagram
2. Mean (SD) Service Costs and Baseline an Follow-Up (2013 US Dollars)

# CONSORT Flow Diagram

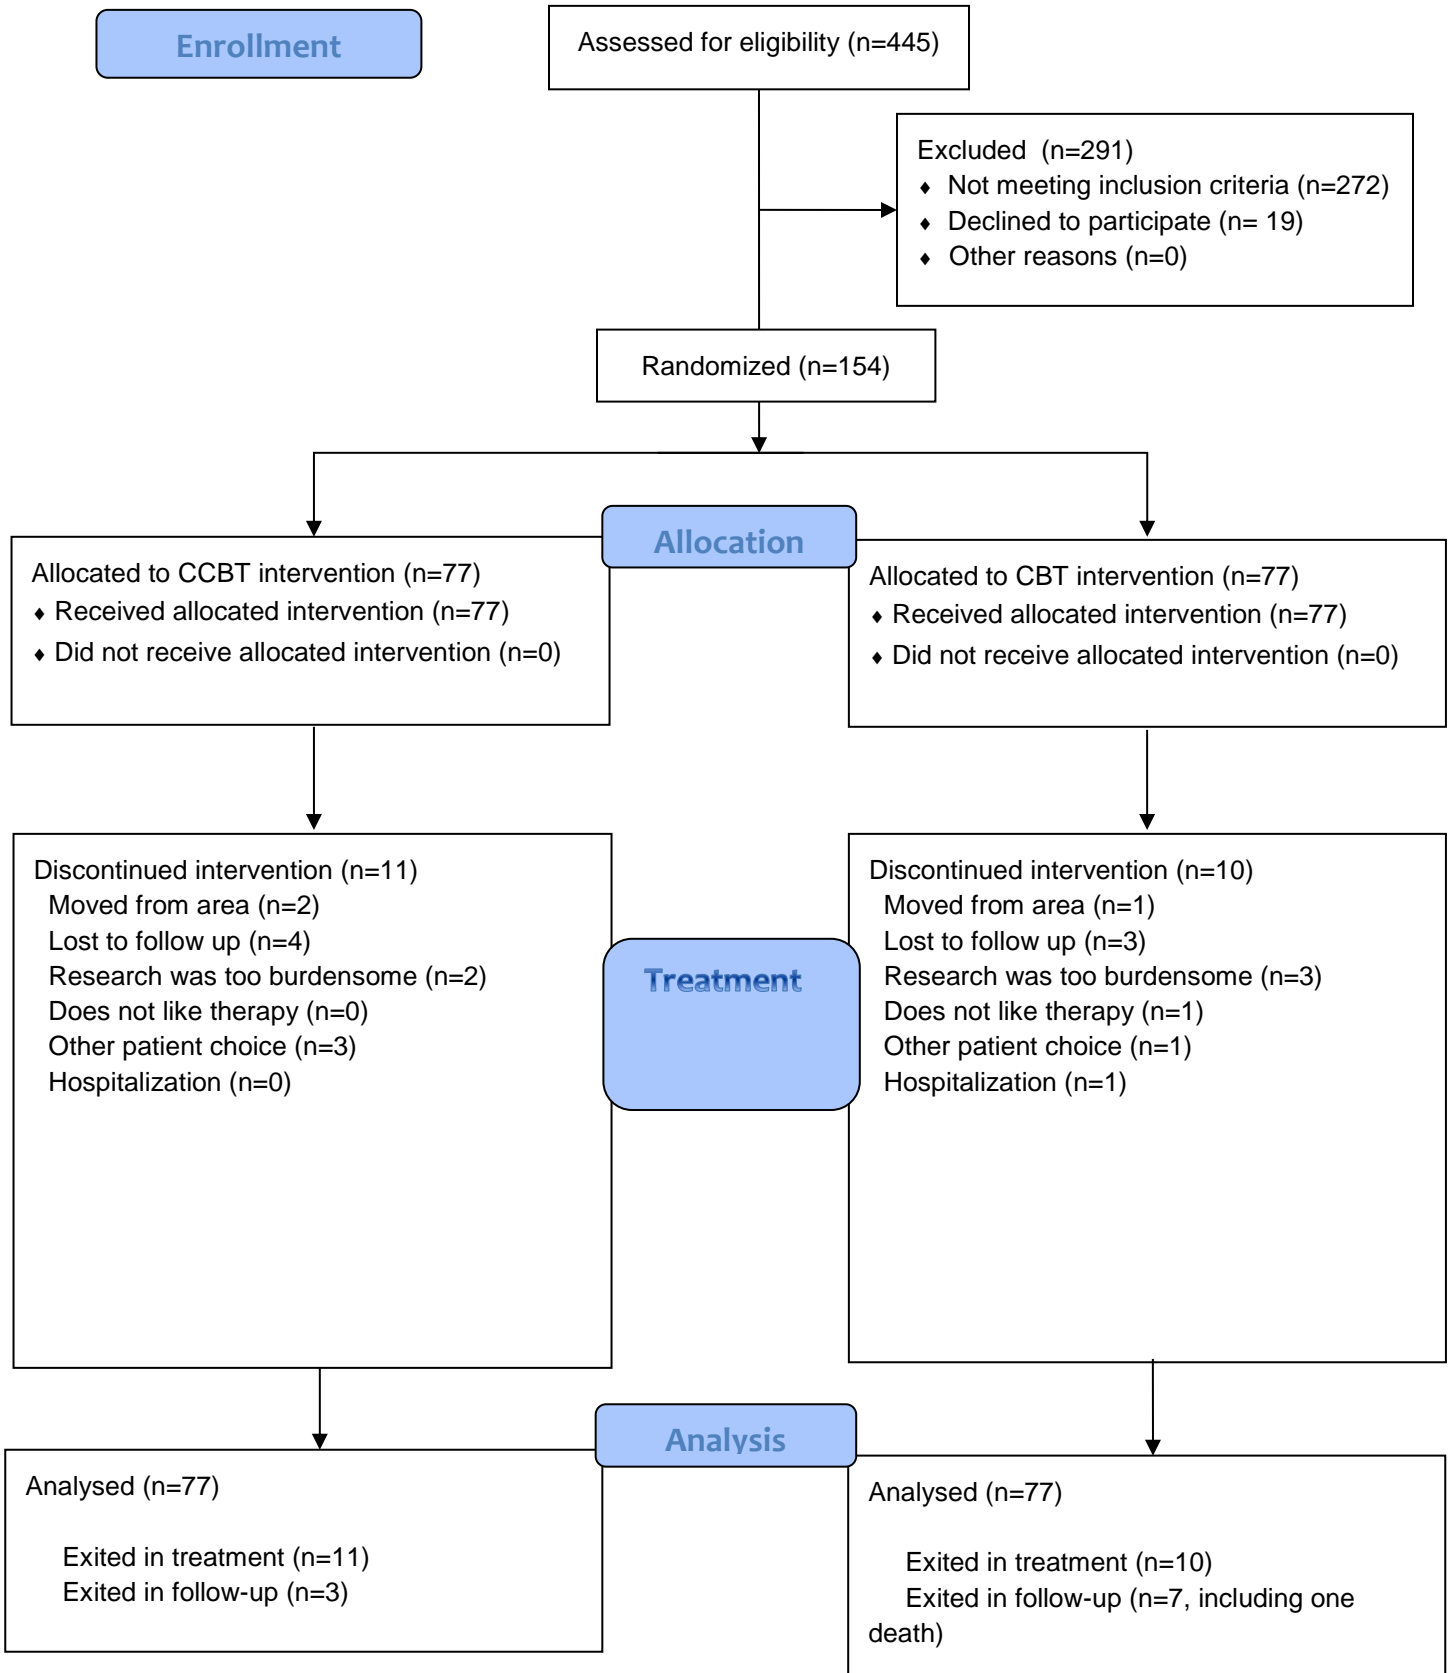

**Mean (SD) Service Costs at Baseline and Follow-Up (2013 US Dollars)**

| Service                | Baseline         |                   | 3-month follow-up  |                    |
|------------------------|------------------|-------------------|--------------------|--------------------|
|                        | CBT              | CCBT              | CBT                | CCBT               |
| Therapy                | 0 (0)            | 0 (0)             | 1232 (203)         | 555 (39)           |
| GP                     | 105 (125)        | 175 (394)         | 94 (114)           | 73 (85)            |
| Psychiatrist           | 41 (123)         | 30 (130)          | 20 (76)            | 23 (90)            |
| Other doctor           | 267 (590)        | 430 (1111)        | 114 (167)          | 170 (316)          |
| Emergency room         | 102 (252)        | 130 (301)         | 86 (270)           | 125 (306)          |
| Nurse                  | 23 (57)          | 18 (44)           | 76 (512)           | 17 (87)            |
| Psychologist           | 62 (360)         | 40 (223)          | 25 (95)            | 9 (50)             |
| Counselor              | 42 (171)         | 38 (132)          | 14 (60)            | 3 (23)             |
| Other therapist        | 20 (118)         | 28 (103)          | 44 (260)           | 21 (155)           |
| Alternative medicine   | 63 (231)         | 45 (202)          | 36 (180)           | 8 (45)             |
| Occupational therapist | 24 (132)         | 0 (0)             | 2 (13)             | 0 (0)              |
| Social worker          | 4 (18)           | 5 (20)            | 3 (15)             | 3 (15)             |
| Homecare worker        | 0 (0)            | 0 (0)             | 28 (215)           | 6 (43)             |
| House work             | 0 (0)            | 0 (0)             | 0 (0)              | 0 (0)              |
| Volunteer              | 1 (3)            | 2 (14)            | <1 (1)             | 26 (196)           |
| Inpatient              | 49 (307)         | 16 (107)          | 394 (2356)         | 208 (908)          |
| <b>Total cost</b>      | <b>802 (976)</b> | <b>957 (1332)</b> | <b>2166 (3465)</b> | <b>1247 (1423)</b> |

CCBT has follow-up costs that are on average \$928 lower than for CBT adjusting for baseline (bootstrapped 95% CI, \$200 to \$1925).
